# Supplementary material
Source: PubMed Central journal article supplement (PMC3037280)
Supplement: NIHMS247436-supplement-Supplementary_Table.pdf [file NIHMS247436-supplement-Supplementary_Table.pdf]

| Chromosome | State                               | MTtype | Ref | Genotype | Capture | Massarray      | Assessment | Change     | Context           | KnownSNP          | Map-qual       | Coverage        | Mapability      | deletion? | Predicted gap extent |
|------------|-------------------------------------|--------|-----|----------|---------|----------------|------------|------------|-------------------|-------------------|----------------|-----------------|-----------------|-----------|----------------------|
| 1          | 59609093 haplo-maternal             | unexp  | G   | aa       | aa      | aa             | PASS       | PASS       | DE_NOVO(dntr)     | transversion(C>T) | cga            | 51,303,624.9    | 16,20,10.9      | 1.000e+00 |                      |
| 2          | 1691103 haplo-paternal              | unexp  | G   | aa       | aa      | aa             | PASS       | PASS       | DE_NOVO(dntr)     | transversion(G>A) | AGC            | 51,303,624.9    | 16,20,10.9      | 1.000e+00 |                      |
| 3          | 12942873 haplo-maternal             | unexp  | A   | aa       | aa      | aa             | PASS       | PASS       | DE_NOVO(dntr)     | transversion(C>G) | ATG            | 54,20,72,153    | 17,20,23.17     | 1.000e+00 |                      |
| 4          | 92099333 nonidentical               | unexp  | G   | aa       | aa      | aa             | PASS       | PASS       | DE_NOVO(dntr)     | transversion(G>A) | AGC            | 90,46,96.39     | 12,24,15.33     | 1.000e+00 |                      |
| 5          | 103939651 nonidentical              | unexp  | G   | aa       | aa      | aa             | PASS       | PASS       | DE_NOVO(dntr)     | transversion(G>A) | cgg            | 60,51,93.68     | 19,16,30.21     | 0.690e+00 |                      |
| 6          | 20392970 haplo-maternal             | unexp  | A   | aa       | aa      | aa             | PASS       | PASS       | DE_NOVO(dntr)     | transversion(C>G) | ATG            | 80,37,93.84     | 13,10,24.91     | 0.870e+00 |                      |
| 7          | 28273935 nonidentical               | unexp  | T   | aa       | aa      | aa             | PASS       | PASS       | DE_NOVO(dntr)     | transversion(T>C) | atc            | 90,61,96.20     | 29,19,31.29     | 0.085e+00 |                      |
| 8          | 130721115 nonidentical              | unexp  | G   | aa       | aa      | aa             | PASS       | PASS       | DE_NOVO(dntr)     | transversion(G>C) | AGT            | 74,25,96.39     | 23,14,14.12     | 1.000e+00 |                      |
| 9          | 21452696 haplo-maternal             | unexp  | G   | aa       | aa      | aa             | PASS       | PASS       | DE_NOVO(dntr)     | transversion(G>A) | CGA            | 36,51,108.17    | 11,16,35.15     | 0.892e+00 |                      |
| 10         | 12934573 haplo-maternal             | unexp  | A   | aa       | aa      | aa             | PASS       | PASS       | DE_NOVO(dntr)     | transversion(C>G) | ATG            | 80,37,93.84     | 13,10,24.91     | 0.870e+00 |                      |
| 11         | 80013989 nonidentical               | unexp  | G   | aa       | aa      | aa             | PASS       | PASS       | DE_NOVO(dntr)     | transversion(G>A) | AGT            | 51,42,87.54     | 16,13,24.17     | 0.818e+00 |                      |
| 12         | 17509042 nonidentical               | unexp  | G   | aa       | aa      | aa             | PASS       | PASS       | DE_NOVO(dntr)     | transversion(G>A) | TGT            | 99,48,87.87     | 12,21,13.32     | 1.000e+00 |                      |
| 13         | 12942873 haplo-maternal             | unexp  | A   | aa       | aa      | aa             | PASS       | PASS       | DE_NOVO(dntr)     | transversion(C>G) | ATG            | 80,37,93.84     | 13,10,24.91     | 0.870e+00 |                      |
| 14         | 35382267 nonidentical               | unexp  | G   | aa       | aa      | aa             | PASS       | PASS       | DE_NOVO(dntr)     | transversion(G>C) | TGC            | 54,36,93.80     | 17,21,19.14     | 0.979e+00 |                      |
| 15         | 81177275 haplo-paternal             | unexp  | C   | aa       | aa      | aa             | PASS       | PASS       | DE_NOVO(dntr)     | transversion(C>G) | GCA            | 69,54,90.118    | 22,17,23.15     | 1.000e+00 |                      |
| 16         | 14038787 haplo-maternal             | unexp  | A   | aa       | aa      | aa             | PASS       | PASS       | DE_NOVO(dntr)     | transversion(C>G) | ATG            | 80,37,93.84     | 13,10,24.91     | 0.870e+00 |                      |
| 17         | 143793752 haplo-maternal            | unexp  | C   | aa       | aa      | aa             | PASS       | PASS       | DE_NOVO(dntr)     | transversion(T>C) | ACC            | 45,54,84.11     | 14,17,27.15     | 1.000e+00 |                      |
| 18         | 135026014 haplo-paternal            | unexp  | T   | aa       | aa      | aa             | PASS       | PASS       | DE_NOVO(dntr)     | transversion(T>C) | atc            | 75,39,87.66     | 12,13,18.33     | 1.000e+00 |                      |
| 19         | 135635782 haplo-maternal            | unexp  | G   | aa       | aa      | aa             | PASS       | PASS       | DE_NOVO(dntr)     | transversion(G>A) | Lga            | 45,39,75.19     | 14,12,24.14     | 0.899e+00 |                      |
| 20         | 140696273 haplo-maternal            | unexp  | A   | aa       | aa      | aa             | PASS       | PASS       | DE_NOVO(dntr)     | transversion(C>G) | ATG            | 75,44,81.87     | 14,17,28.37     | 0.899e+00 |                      |
| 21         | 19157786 haplo-maternal             | unexp  | A   | aa       | aa      | aa             | PASS       | PASS       | DE_NOVO(dntr)     | transversion(G>A) | cat            | 84,69,76.72     | 27,23,23.23     | 0.970e+00 |                      |
| 22         | 74585881 haplo-maternal             | unexp  | T   | aa       | aa      | aa             | PASS       | PASS(1)    | DE_NOVO(dntr)     | transversion(T>C) | ATG            | 129,57,255.63   | 42,18,37.20     | 0.917e+00 |                      |
| 23         | 16169685 haplo-maternal             | unexp  | A   | aa       | aa      | aa             | PASS       | PASS       | DE_NOVO(dntr)     | transversion(C>G) | ATG            | 80,37,93.84     | 13,10,24.91     | 0.870e+00 |                      |
| 24         | 87655888 haplo-maternal             | unexp  | G   | aa       | aa      | aa             | PASS       | PASS       | DE_NOVO(dntr)     | transversion(G>A) | GOT            | 69,42,85.48     | 22,13,27.15     | 1.000e+00 |                      |
| 25         | 25568772 haplo-paternal             | unexp  | G   | aa       | aa      | aa             | PASS       | PASS       | DE_NOVO(dntr)     | transversion(G>A) | CGT            | 75,39,87.66     | 12,27,13.57     | 1.000e+00 |                      |
| 26         | 20077009 haplo-maternal             | unexp  | A   | aa       | aa      | aa             | PASS       | PASS       | DE_NOVO(dntr)     | transversion(C>G) | ATG            | 75,39,87.66     | 12,27,13.57     | 1.000e+00 |                      |
| 27         | 33475280 haplo-paternal             | unexp  | A   | aa       | aa      | aa             | PASS       | PASS(2)    | DE_NOVO(dntr)     | transversion(G>A) | CAG            | 75,60,76.120    | 20,24,15.1      | 1.000e+00 |                      |
| 28         | 68024048 nonidentical               | unexp  | T   | aa       | aa      | aa             | PASS       | PASS       | DE_NOVO(dntr)     | transversion(T>C) | atc            | 87,48,108.168   | 28,15,35.20     | 0.991e+00 |                      |
| 29         | 18414133 nonidentical               | unexp  | G   | aa       | aa      | aa             | PASS       | PASS       | DE_NOVO(dntr)     | transversion(G>A) | AAA            | 81,105,148      | 24,24,26.48     | 1.000e+00 |                      |
| 30         | 76273195 nonidentical               | unexp  | G   | aa       | aa      | aa             | PASS       | PASS       | DE_NOVO(dntr)     | transversion(G>A) | AAA            | 12,8,17.48      | 1.000e+00       | 0.991e+00 |                      |
| 31         | 13358466 nonidentical               | unexp  | A   | aa       | aa      | aa             | PASS       | PASS       | DE_NOVO(dntr)     | transversion(A>C) | CAG            | 33,63,164.42    | 20,14,21.13     | 1.000e+00 |                      |
| 32         | 4680806 haplo-maternal              | unexp  | C   | aa       | aa      | aa             | PASS       | PASS       | DE_NOVO(dntr)     | transversion(T>C) | cgc            | 90,45,66.46     | 12,21,13.32     | 0.994e+00 |                      |
| 33         | 12942873 haplo-maternal             | unexp  | A   | aa       | aa      | aa             | PASS       | PASS       | DE_NOVO(dntr)     | transversion(C>G) | ATG            | 69,33,93.137    | 12,21,13.32     | 0.870e+00 |                      |
| 34         | 93693758 haplo-maternal             | unexp  | G   | aa       | aa      | aa             | PASS       | PASS       | DE_NOVO(dntr)     | transversion(G>T) | GGG            | 90,45,66.46     | 12,28,8.38      | 1.000e+00 |                      |
| 35         | 82252897 haplo-maternal             | unexp  | G   | aa       | aa      | aa             | PASS       | PASS       | DE_NOVO(dntr)     | transversion(G>A) | CGT            | 51,51,72.91     | 16,16,23.13     | 0.843e+00 |                      |
| 36         | 14038787 haplo-maternal             | unexp  | A   | aa       | aa      | aa             | PASS       | PASS       | DE_NOVO(dntr)     | transversion(C>G) | ATG            | 80,37,93.84     | 13,10,24.91     | 0.870e+00 |                      |
| 37         | 48770795 haplo-maternal             | unexp  | T   | aa       | aa      | aa             | PASS       | PASS       | DE_NOVO(dntr)     | transversion(T>C) | gac            | 75,39,87.66     | 12,17,8.27      | 0.982e+00 |                      |
| 38         | 63860567 nonidentical               | unexp  | A   | aa       | aa      | aa             | PASS       | PASS       | DE_NOVO(dntr)     | transversion(A>C) | tct            | 72,30,154.18    | 23,9,26.26      | 0.997e+00 |                      |
| 39         | 14038787 haplo-maternal             | unexp  | A   | aa       | aa      | aa             | PASS       | PASS       | DE_NOVO(dntr)     | transversion(C>G) | ATG            | 80,37,93.84     | 13,10,24.91     | 0.870e+00 |                      |
| 40         | 17336839 nonidentical               | unexp  | G   | aa       | aa      | aa             | PASS       | PASS       | DE_NOVO(dntr)     | transversion(G>A) | tgt            | 63,681.50       | 20,19,13.2      | 1.000e+00 |                      |
| 41         | 3987841 haplo-paternal              | unexp  | C   | aa       | aa      | aa             | PASS       | PASS       | DE_NOVO(dntr)     | transversion(C>T) | acg            | 255,255,255.155 | 115,103,101.102 | 0.939e+00 |                      |
| 42         | 17482424 haplo-maternal             | unexp  | A   | aa       | aa      | aa             | PASS       | PASS       | DE_NOVO(dntr)     | transversion(C>T) | CCC            | 42,39,96.39     | 12,13,17.12     | 0.953e+00 |                      |
| 43         | 18515852 haplo-maternal             | unexp  | A   | aa       | aa      | aa             | PASS       | PASS       | DE_NOVO(dntr)     | transversion(A>C) | atc            | 90,45,66.46     | 12,21,13.32     | 0.982e+00 |                      |
| 44         | 36888576 haplo-maternal             | unexp  | A   | aa       | aa      | aa             | PASS       | PASS       | DE_NOVO(dntr)     | transversion(A>T) | TAT            | 99,78,253.66    | 32,25,39.21     | 0.992e+00 |                      |
| 45         | 5590262 haplo-maternal              | unexp  | G   | aa       | aa      | aa             | PASS       | PASS       | DE_NOVO(dntr)     | transversion(G>T) | GGG            | 90,42,206.57    | 32,24,33.18     | 0.992e+00 |                      |
| 46         | 14038787 haplo-maternal             | unexp  | A   | aa       | aa      | aa             | PASS       | PASS       | DE_NOVO(dntr)     | transversion(C>G) | ATG            | 80,37,93.84     | 13,10,24.91     | 0.870e+00 |                      |
| 47         | 14271779 haplo-maternal,compression | unexp  | A   | aa       | aa      | aa,ab          | PASS       | FALSE CALL | transversion(A>C) | AAC               | rs12143040     | 88,54,134.27    | 12,19,13.35     | 0.804e+00 |                      |
| 48         | 13474004 haplo-maternal,compression | unexp  | G   | aa       | aa      | aa,ab,ab,ab    | PASS       | FALSE CALL | transversion(T>T) | TGA               | 34,108.627     | 4,43,5,29.49    | 1.000e+00       |           |                      |
| 49         | 13474004 haplo-maternal,compression | unexp  | G   | aa       | aa      | aa,ab,ab,ab    | PASS       | FALSE CALL | transversion(T>T) | TGA               | 34,108.627     | 4,43,5,29.49    | 1.000e+00       |           |                      |
| 50         | 122979650 nonidentical,compression  | unexp  | A   | aa       | aa      | aa,ab,ab,ab    | PASS       | FALSE CALL | transversion(A>C) | CAC               | 108,131,238.70 | 47,61,76.55     | 0.977e+00       |           |                      |
| 51         | 212961014 nonidentical,compression  | unexp  | G   | aa       | aa      | aa,ab,ab,ab    | PASS       | FALSE CALL | transversion(G>A) | ATC               | 105,166,111.59 | 38,48,28.48     | 0.992e+00       |           |                      |
| 52         | 277983 nonidentical                 | unexp  | G   | aa       | aa      | aa,ab,ab,ab    | PASS       | FALSE CALL | transversion(G>A) | CCT               | 106,46,63.5    | 64,26,66.66     | 1.000e+00       |           |                      |
| 53         | 37827874 nonidentical,compression   | unexp  | G   | aa       | aa      | aa,ab,ab,ab    | PASS       | FALSE CALL | transversion(T>C) | ATC               | rs4717688      | 12,13,14.36     | 0.970e+00       |           |                      |
| 54         | 21133517 nonidentical,compression   | unexp  | G   | aa       | aa      | aa,ab,ab,ab    | PASS       | FALSE CALL | transversion(G>A) | ATC               | rs2588002      | 95,85,99.43     | 49,38,40.31     | 0.867e+00 |                      |
| 55         | 12219486 nonidentical               | unexp  | T   | aa       | aa      | aa,ab,ab,ab    | PASS       | FALSE CALL | transversion(T>C) | GTA               | rs3739807      | 151,181,194.51  | 9,28,20.31      | 0.954e+00 |                      |
| 56         | 224048752 haplo-paternal            | unexp  | G   | aa       | aa      | aa,ab,ab,ab    | PASS       | FALSE CALL | transversion(C>A) | acg               | known-A        | 102,117,160.104 | 61,56,71.25     | 0.875e+00 |                      |
| 57         | 24265772 haplo-paternal             | unexp  | G   | aa       | aa      | aa,ab,ab,ab    | PASS       | FALSE CALL | transversion(G>A) | CGA               | rs6725983      | 10,42,32.61     | 0.892e+00       |           |                      |
| 58         | 650902 nonidentical,compression     | unexp  | G   | aa       | aa      | aa,ab,ab,ab    | PASS       | FALSE CALL | transversion(G>A) | CGG               | rs62236960     | 12,15,28.73     | 0.970e+00       |           |                      |
| 59         | 613249 nonidentical,compression     | unexp  | G   | aa       | aa      | aa,ab,ab,ab    | PASS       | FALSE CALL | transversion(G>C) | CGC               | known-A        | 11,29,20.83     | 0.964e+00       |           |                      |
| 60         | 75781713 nonidentical,error         | unexp  | G   | aa       | aa      | aa,ab,ab,ab    | PASS       | FALSE CALL | transversion(G>A) | ggg               | 47,123,79.99   | 79,62,89.73     | 1.000e+00       |           |                      |
| 61         | 16814216 haplo-maternal             | unexp  | A   | aa       | aa      | aa,ab,ab,ab    | PASS       | FALSE CALL | transversion(C>T) | CTG               | rs1249585      | 83,33,34.3      | 15,11,26.8      | 0.879e+00 |                      |
| 62         | 37959505 haplo-maternal             | unexp  | A   | aa       | aa      | aa,ab,ab,ab    | PASS       | FALSE CALL | transversion(G>A) | CTC               | rs12499556     | 172,36,169.71   | 90,75,85.90     | 0.854e+00 |                      |
| 63         | 19694850 haplo-paternal             | unexp  | C   | aa       | aa      | aa,ab,ab,ab    | PASS       | FALSE CALL | transversion(C>T) | cgc               | rs2688443      | 12,28,30.47     | 1.000e+00       |           |                      |
| 64         | 431518 nonidentical                 | unexp  | A   | aa       | aa      | aa,ab,ab,ab    | PASS       | FALSE CALL | transversion(A>C) | cat               | rs3950741      | 47,96,69.8      | 75,73,91.82     | 0.554e+00 |                      |
| 65         | 74787474 nonidentical,error         | unexp  | A   | aa       | aa      | aa,ab,ab,ab(3) | PASS       | FALSE CALL | transversion(C>T) | CTG               | rs12499556     | 172,36,169.71   | 90,75,85.90     | 0.854e+00 |                      |
| 66         | 768475 nonidentical                 | unexp  | G   | aa       | aa      | aa,ab,ab,ab    | PASS       | FALSE CALL | transversion(G>T) | Lgt               | rs1468250      | 127,127.40      | 1.000e+00       |           |                      |
| 67         | 4113902 nonidentical                | unexp  | A   | aa       | aa      | aa,ab,ab,ab    | PASS       | FALSE CALL | transversion(T>C) | GTG               | known-A        | 47,120,31.15    | 47,36,31.34     | 0.844e+00 |                      |
| 68         | 13161383 nonidentical               | unexp  | A   | aa       | aa      | aa,ab,ab,ab    | PASS       | FALSE CALL | transversion(G>A) | CTG               | known-A        | 11,44,35.38     | 1.000e+00       | 0.970e+00 |                      |
| 69         | 18978967 nonidentical               | unexp  | T   | aa       | aa      | aa,ab,ab,ab    | PASS       | FALSE CALL | transversion(T>C) | CTG               | known-C        | 255,420,315     | 113,117,107.1   | 0.974e+00 |                      |
| 70         | 19505699 nonidentical,compression   | unexp  | C   | aa       | aa      | aa,ab,ab,ab    | PASS       | FALSE CALL | transversion(C>A) | CCG               | known-A        | 9,20,21.37      | 0.917e+00       |           |                      |
| 71         | 12439272 nonidentical               | unexp  | A   | aa       | aa      | aa,ab,ab,ab    | PASS       | FALSE CALL | transversion(C>G) | CTC               | rs6863352      | 84,32,23.127    | 12,19,9.109     | 0.970e+00 |                      |
| 72         | 149292055 haplo-maternal            | unexp  | G   | aa       | aa      | aa,ab,ab,ab    | PASS       | FALSE CALL | transversion(G>A) | CTC               | known-A        | 183,62,105.32   | 27,30,34.23     | 0.883e+00 |                      |
| 73         | 31412187 nonidentical,error         | unexp  | T   | aa       | aa      | aa,ab,ab,ab    | PASS       | FALSE CALL | transversion(T>C) | CTG               | rs2875292      | 12,20,34.34     | 1.000e+00       |           |                      |
| 74         | 7328080 nonidentical,compression    | unexp  | T   | aa       | aa      | aa,ab,ab,ab    | PASS       | FALSE CALL | transversion(T>A) | CTG               | rs2397285      | 57,126,240.21   | 49,164,63.1     | 0.980e+00 |                      |
| 75         | 14038787 haplo-maternal             | unexp  | A   | aa       | aa      | aa,ab,ab,ab    | PASS       | FALSE CALL | transversion(C>G) | ATG               | known-A        | 40,25,39.2      | 1.000e+00       | 0.989e+00 |                      |
| 76         | 148447968 haplo-paternal            | unexp  | T   | aa       | aa      | aa,ab,ab,ab    | PASS       | FALSE CALL | transversion(T>C) | ATG               | rs1759201      | 12,29,8.17      | 1.000e+00       |           |                      |
| 77         | 56528718 haplo-paternal,error       | unexp  | A   | aa       | aa      | aa,ab,ab,ab    | PASS       | FALSE CALL | transversion(A>C) | gaa               | known-G        | 11,36,27.58     | 1.000e+00       | 0.989e+00 |                      |
| 78         | 52741472 haplo-paternal             | unexp  | A   | aa       | aa      | aa,ab,ab,ab    | PASS       | FALSE CALL | transversion(C>G) | ATG               | known-A        | 12,17,14.26     | 1.000e+00       | 0.989e+00 |                      |
| 79         | 62743550 haplo-paternal             | unexp  | C   | aa       | aa      | aa,ab,ab,ab    | PASS       | FALSE CALL | transversion(C>A) | acg               | rs9647715      | 12,18,23.15     | 0.821e+00       |           |                      |
| 80         | 64899927 haplo-paternal,error       | unexp  | T   | aa       | aa      | aa,ab,ab,ab    | PASS       | FALSE CALL | transversion(T>C) | atc               | rs3730063      | 135,44,52.46    | 44,14,48.37     | 0.879e+00 |                      |
| 81         | 1913689 haplo-maternal              | unexp  | A   | aa       | aa      | aa,ab,ab,ab    | PASS       | FALSE CALL | transversion(C>G) | ATG               | known-A        | 104,101,91.106  | 0.970e+00       |           |                      |
| 82         | 1457016 haplo-maternal,error        | unexp  | G   | aa       | aa      | aa,ab,ab,ab    | PASS       | FALSE CALL | transversion(G>A) | CGG               | known-A        | 189,155,233.45  | 74,190.15       | 0.942e+00 |                      |
| 83         | 20657                               |        |     |          |         |                |            |            |                   |                   |                |                 |                 |           |                      |
